# Supplementary material
Source: publisher figshare collection journal article supplement (https://acs.figshare.com/ndownloader/files/30475303)
Supplement: Supplementary file 1 [file 30475303]

## **Supporting Information**

### **Characterization of pore structure and fluid movability of coal-measure sedimentary rocks by nuclear magnetic resonance (NMR)**

Na Zhang<sup>ab\*</sup>, Shuaidong Wang<sup>ab</sup>, Fangfang Zhao<sup>ab</sup>, Xiaoming Sun<sup>ab</sup>, Manchao He<sup>ab</sup>

a State Key Laboratory for GeoMechanics and Deep Underground Engineering, 100083 Beijing, China

b School of Mechanics, Architecture and Civil Engineering, China University of Mining and Technology, 100083 Beijing, China

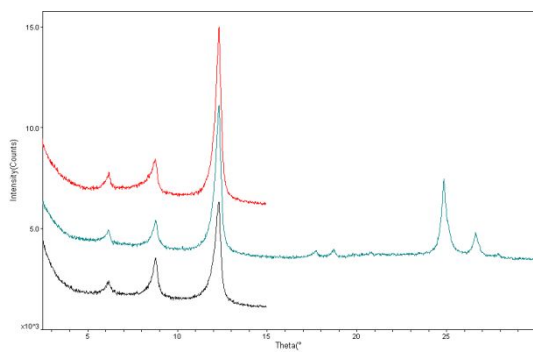

(a)

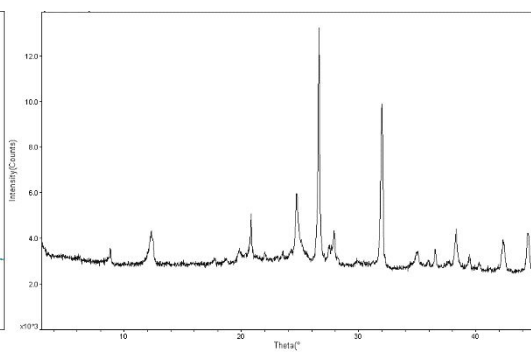

(b)

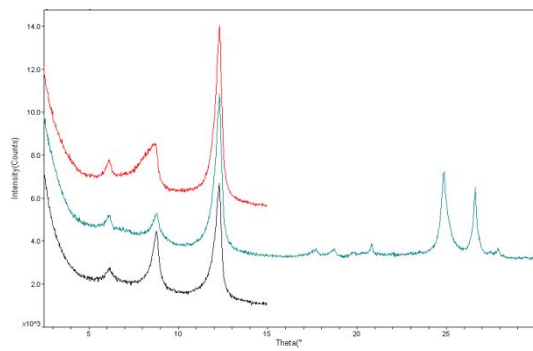

(c)

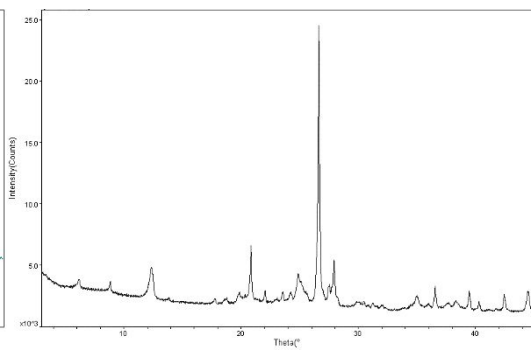

(d)

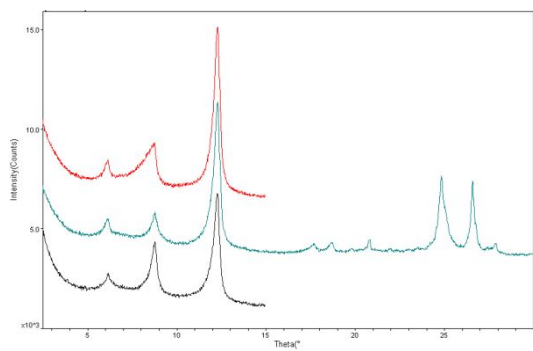

(e)

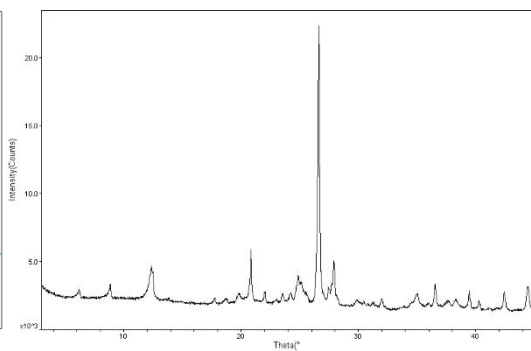

(f)

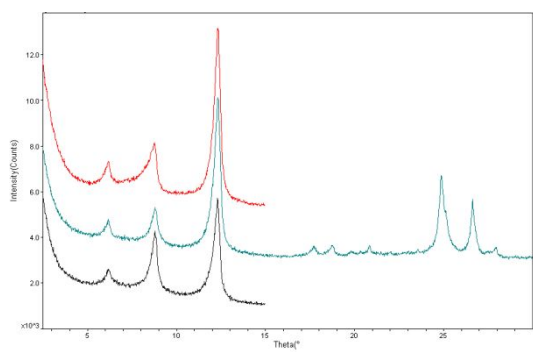

(g)

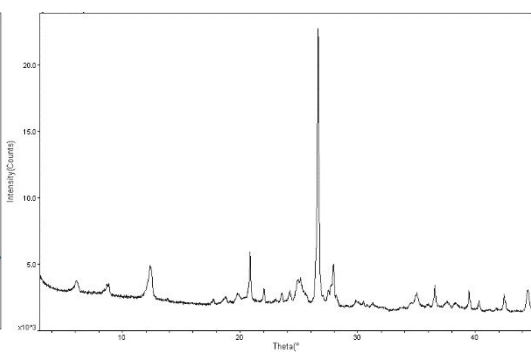

(h)

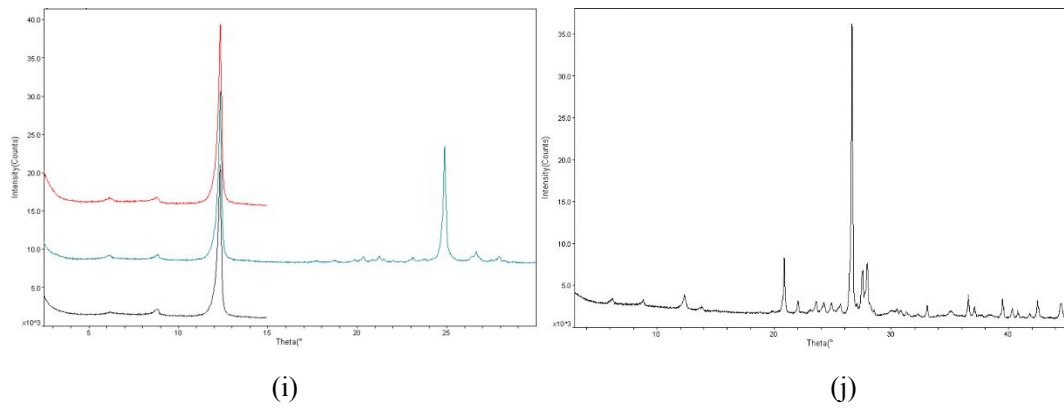

**Figure S1.** The X-ray fluorescence measurements of the investigated samples, the clay minerals content of the (a) SH-1, (c) SH-2, (e) MS-1, (g) MS-2, and (i) SS-1 samples, and the non-clay minerals content of the (b) SH-1, (d) SH-2, (f) MS-1, (h) MS-2, and (j) SS-1 samples
